# Supplementary material
Source: PubMed Central journal article supplement (PMC2951858)

**Figure S1. Increased CD11b cells in  $LT\beta^{-/-}$  mouse tracheas following infection with *M. pulmonis*.** LYVE-1<sup>+</sup> positive lymphatic vessels (red) and CD11b<sup>+</sup> positive infiltrates (green) in the tracheas of mice infected with *M. pulmonis*. Scale bar is 200  $\mu\text{m}$ .

**Figure S2. Absence of increased lymphangiogenesis in  $TNFR1^{-/-}$  mouse skin following the induction of inflammation.** Fluorescent microscopy of the site of immunization with ovalbumin and CFA after nanoparticle injection reveals no lymphatic vessel networks in proximity to the immunization depot site in  $TNFR1^{-/-}$  mice. Black blood vessels are apparent and even more obvious after immunization. Lymphatic vessels would be bright green (See Fig. 4). Representative images of 2 or 3 mice per time point from two separate experiments (13 mice total).

**Figure S3.  $LT\alpha$ ,  $LT\beta$ , and  $TNF\alpha$  mRNAs at the site of immunization in the skin at day 7.** WT mice express  $LT\alpha$ ,  $LT\beta$  and  $TNF\alpha$  mRNA in the skin, spleen and peripheral lymph node (PLN).  $LT\alpha^{-/-}$  mice had no detectable  $LT\alpha$  mRNA in the skin or spleen as expected, but demonstrated  $LT\beta$  and  $TNF\alpha$  mRNA expression in these organs.  $LT\beta^{-/-}$  mice expressed  $TNF\alpha$  and  $LT\alpha$  mRNA in the skin and mesenteric lymph node (MLN).  $LT\alpha$  mRNA is 485 bp; partially spliced is 709 bp;  $LT\beta$  mRNA is 640bp;  $TNF$  mRNA is 700bp.

# Figure Supplement 1

Pathogen-free

Infected

WT

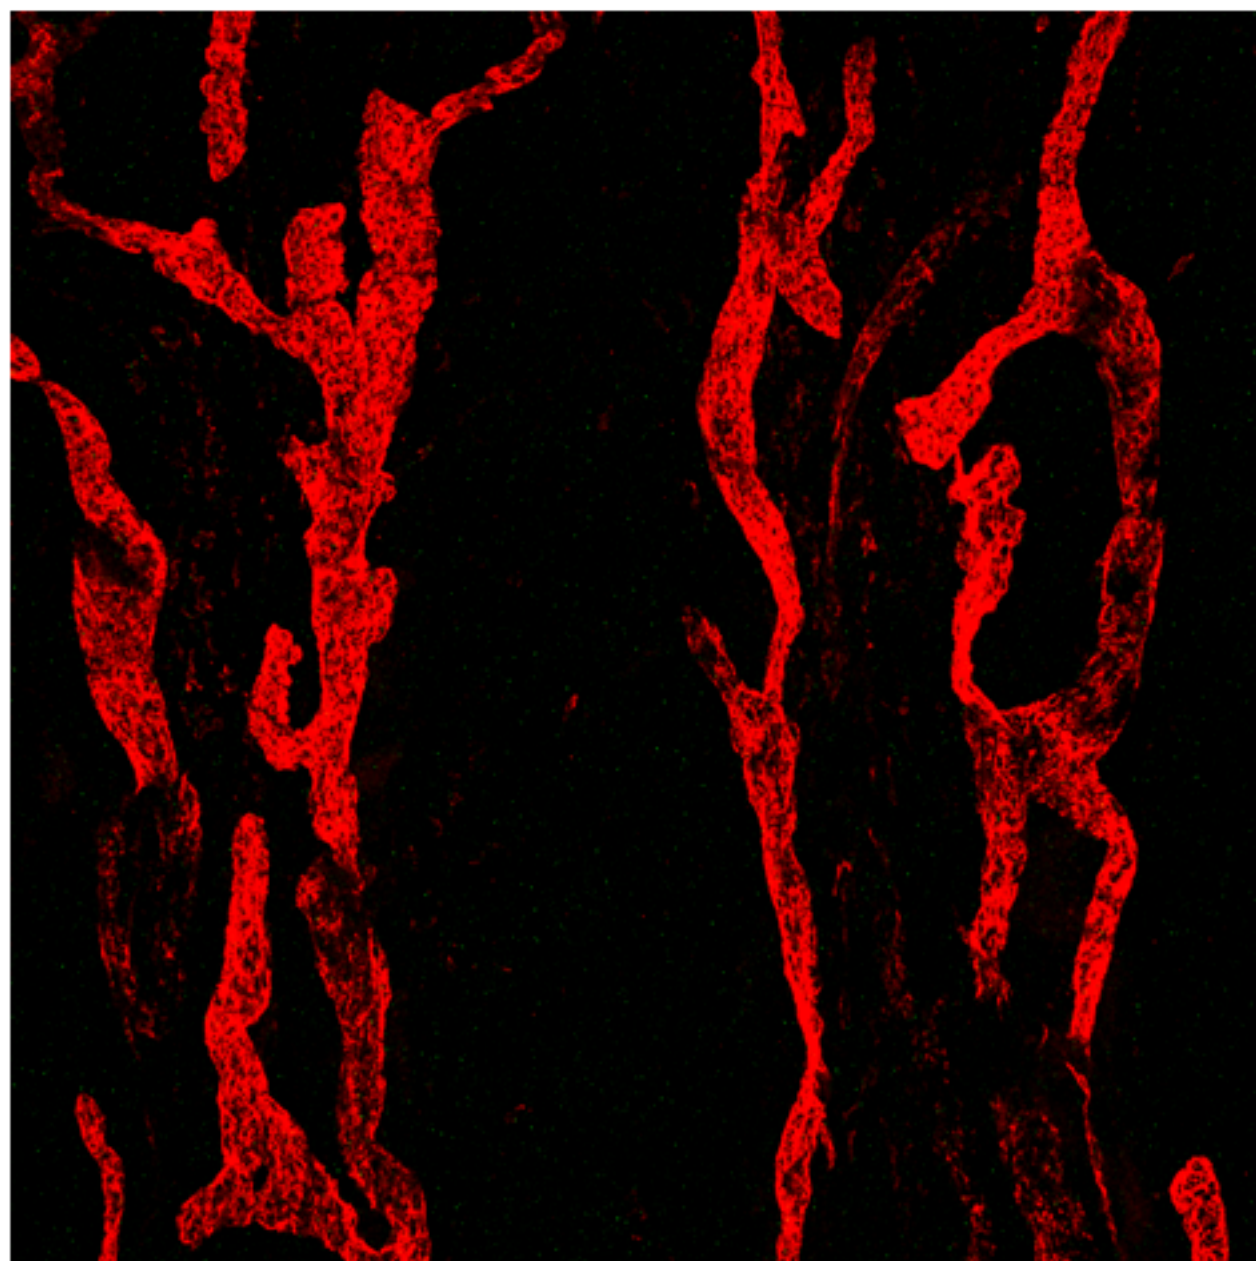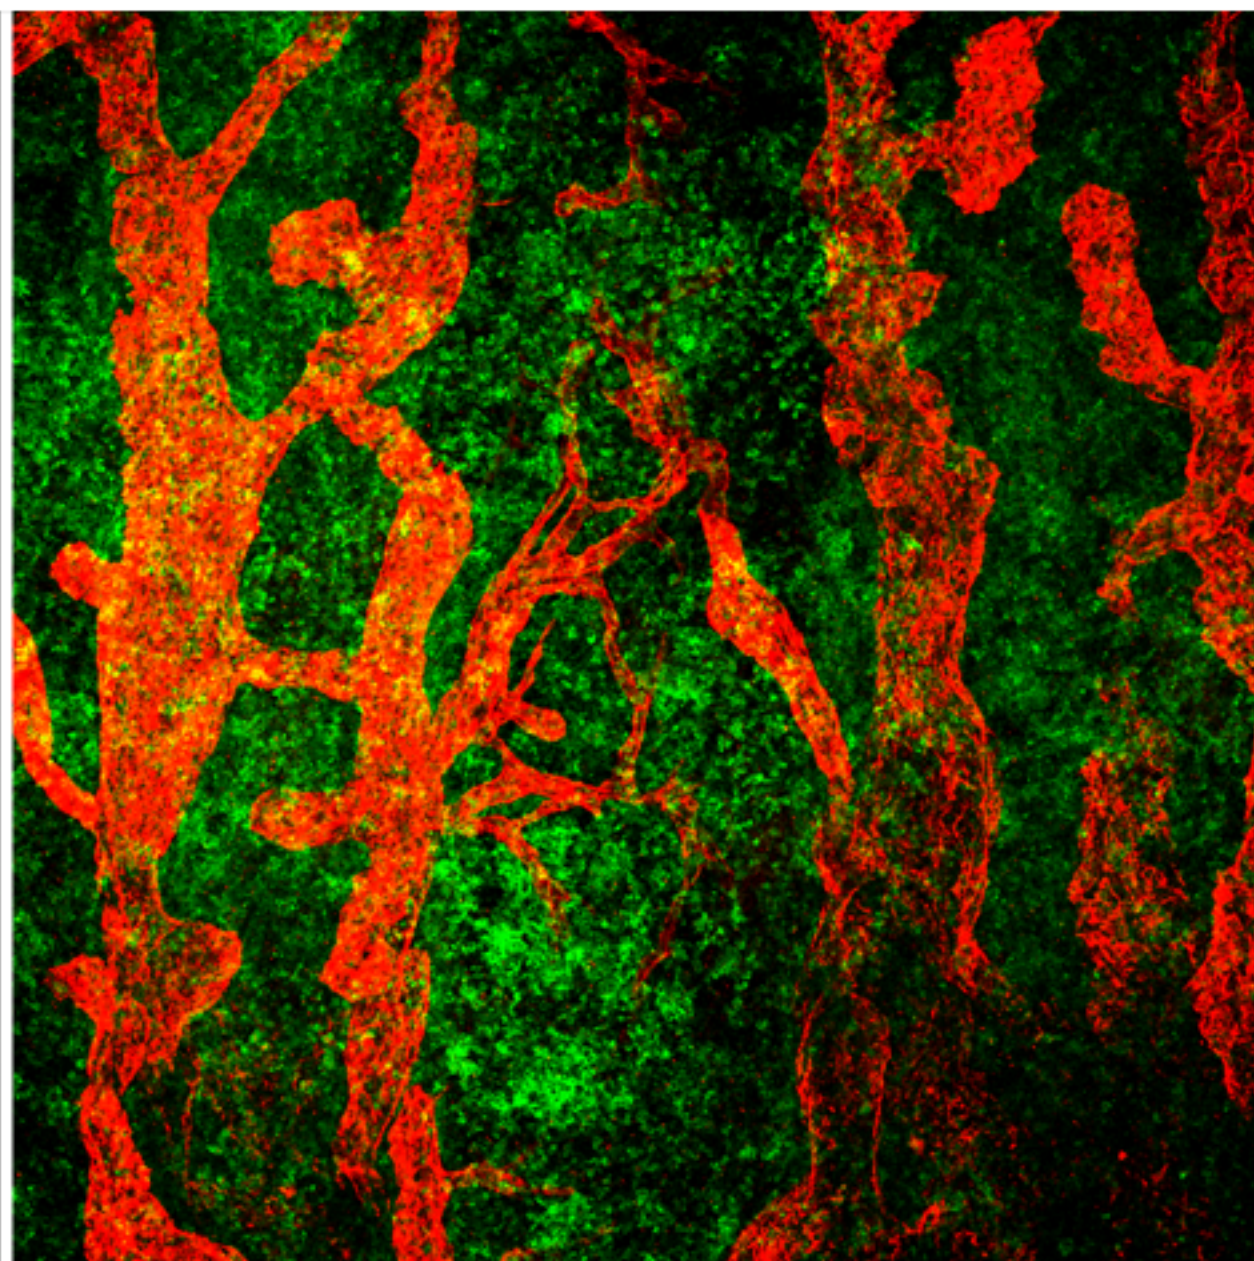

LT $\alpha$ <sup>-/-</sup>

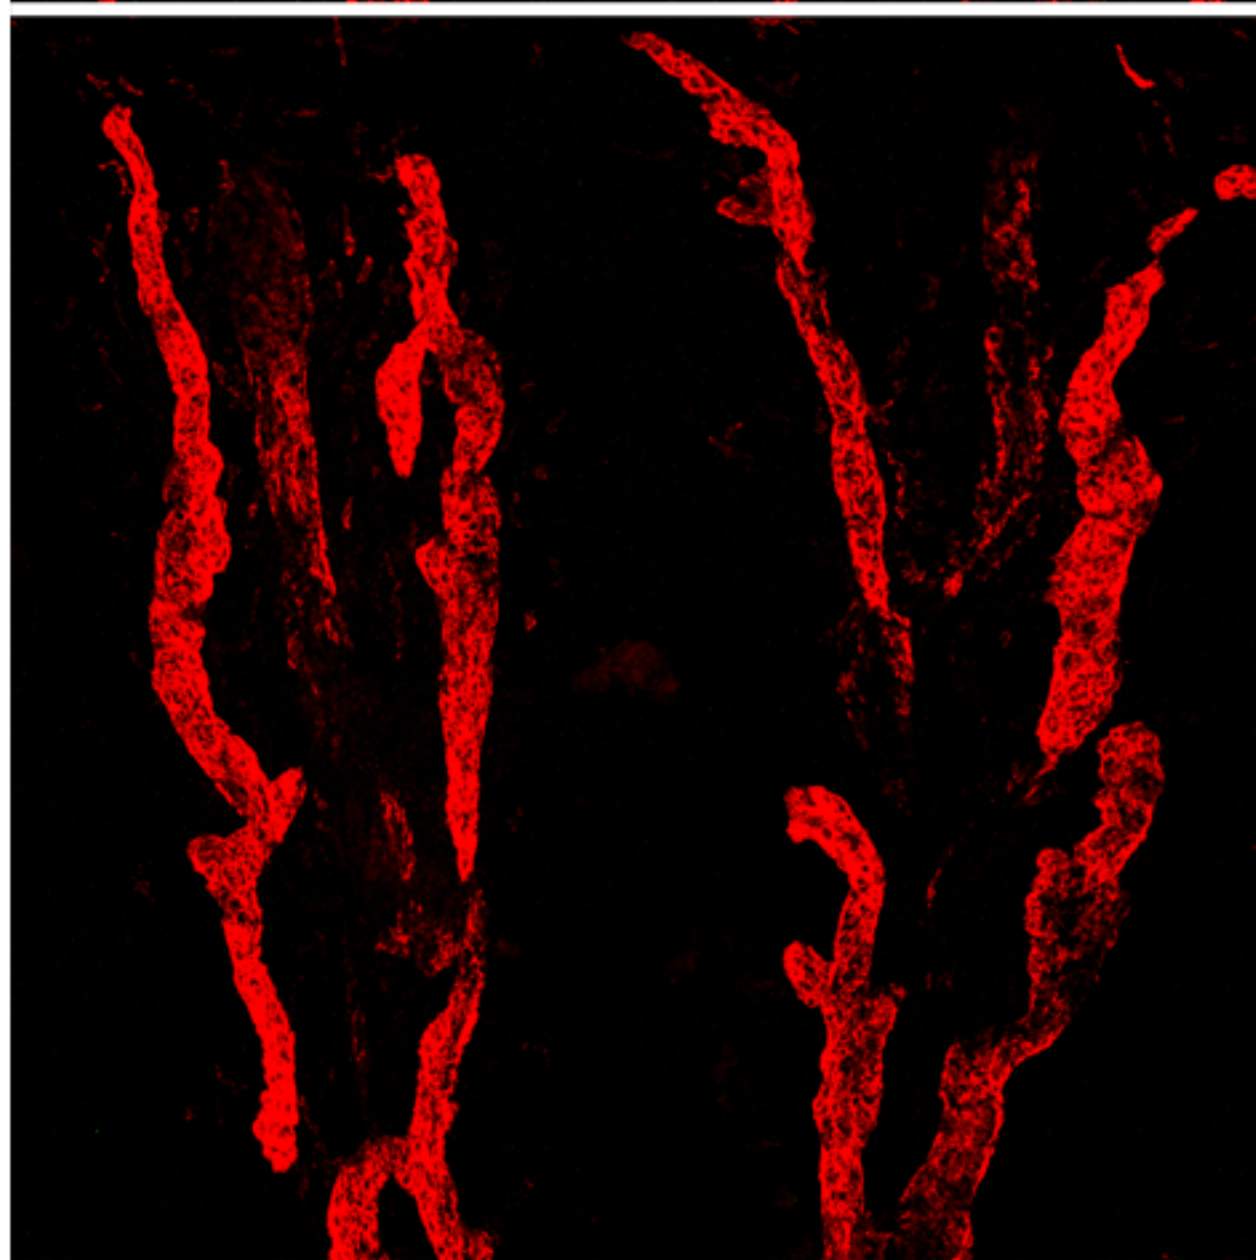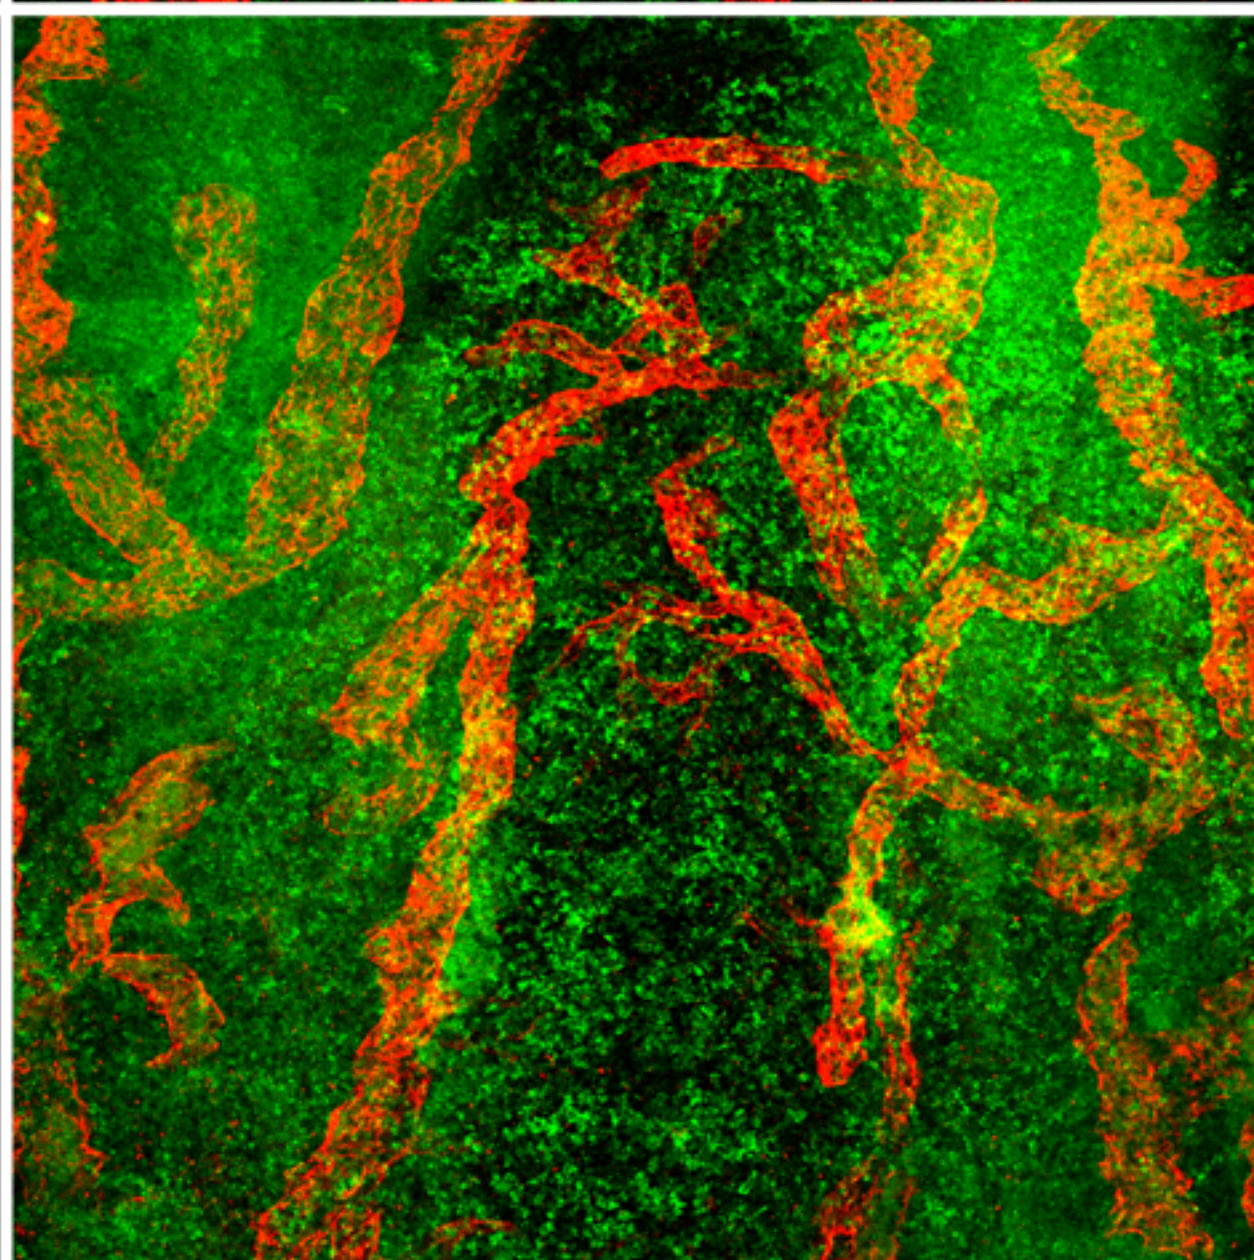

LT $\beta$ <sup>-/-</sup>

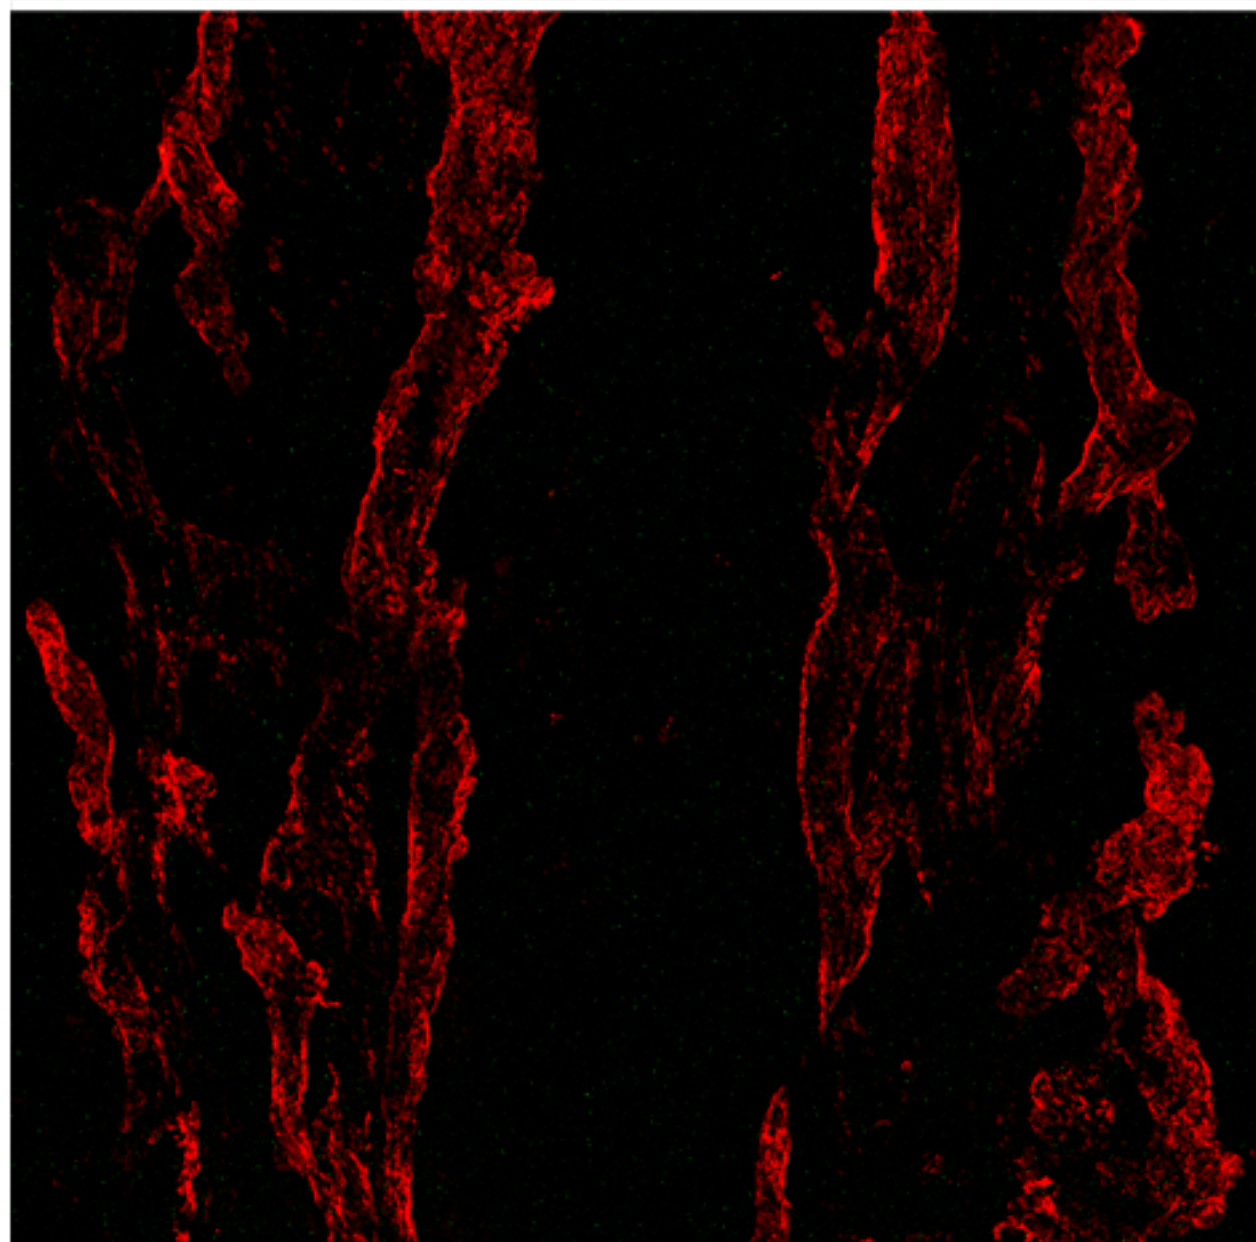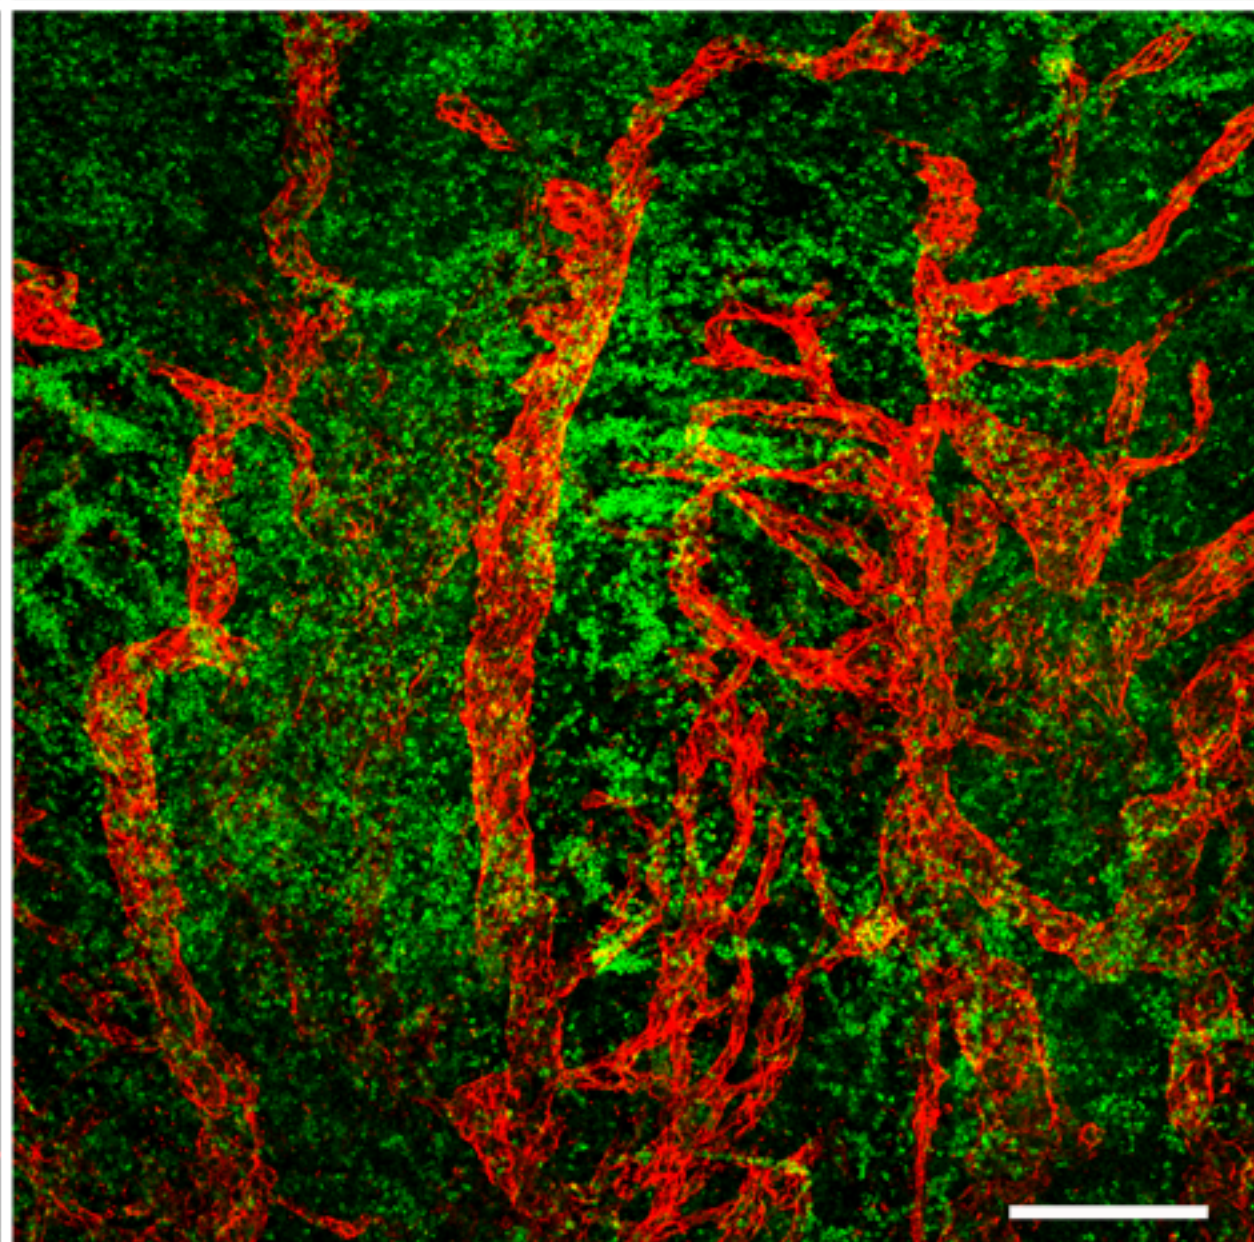

Figure Supplement 2.

TNFR1<sup>-/-</sup>

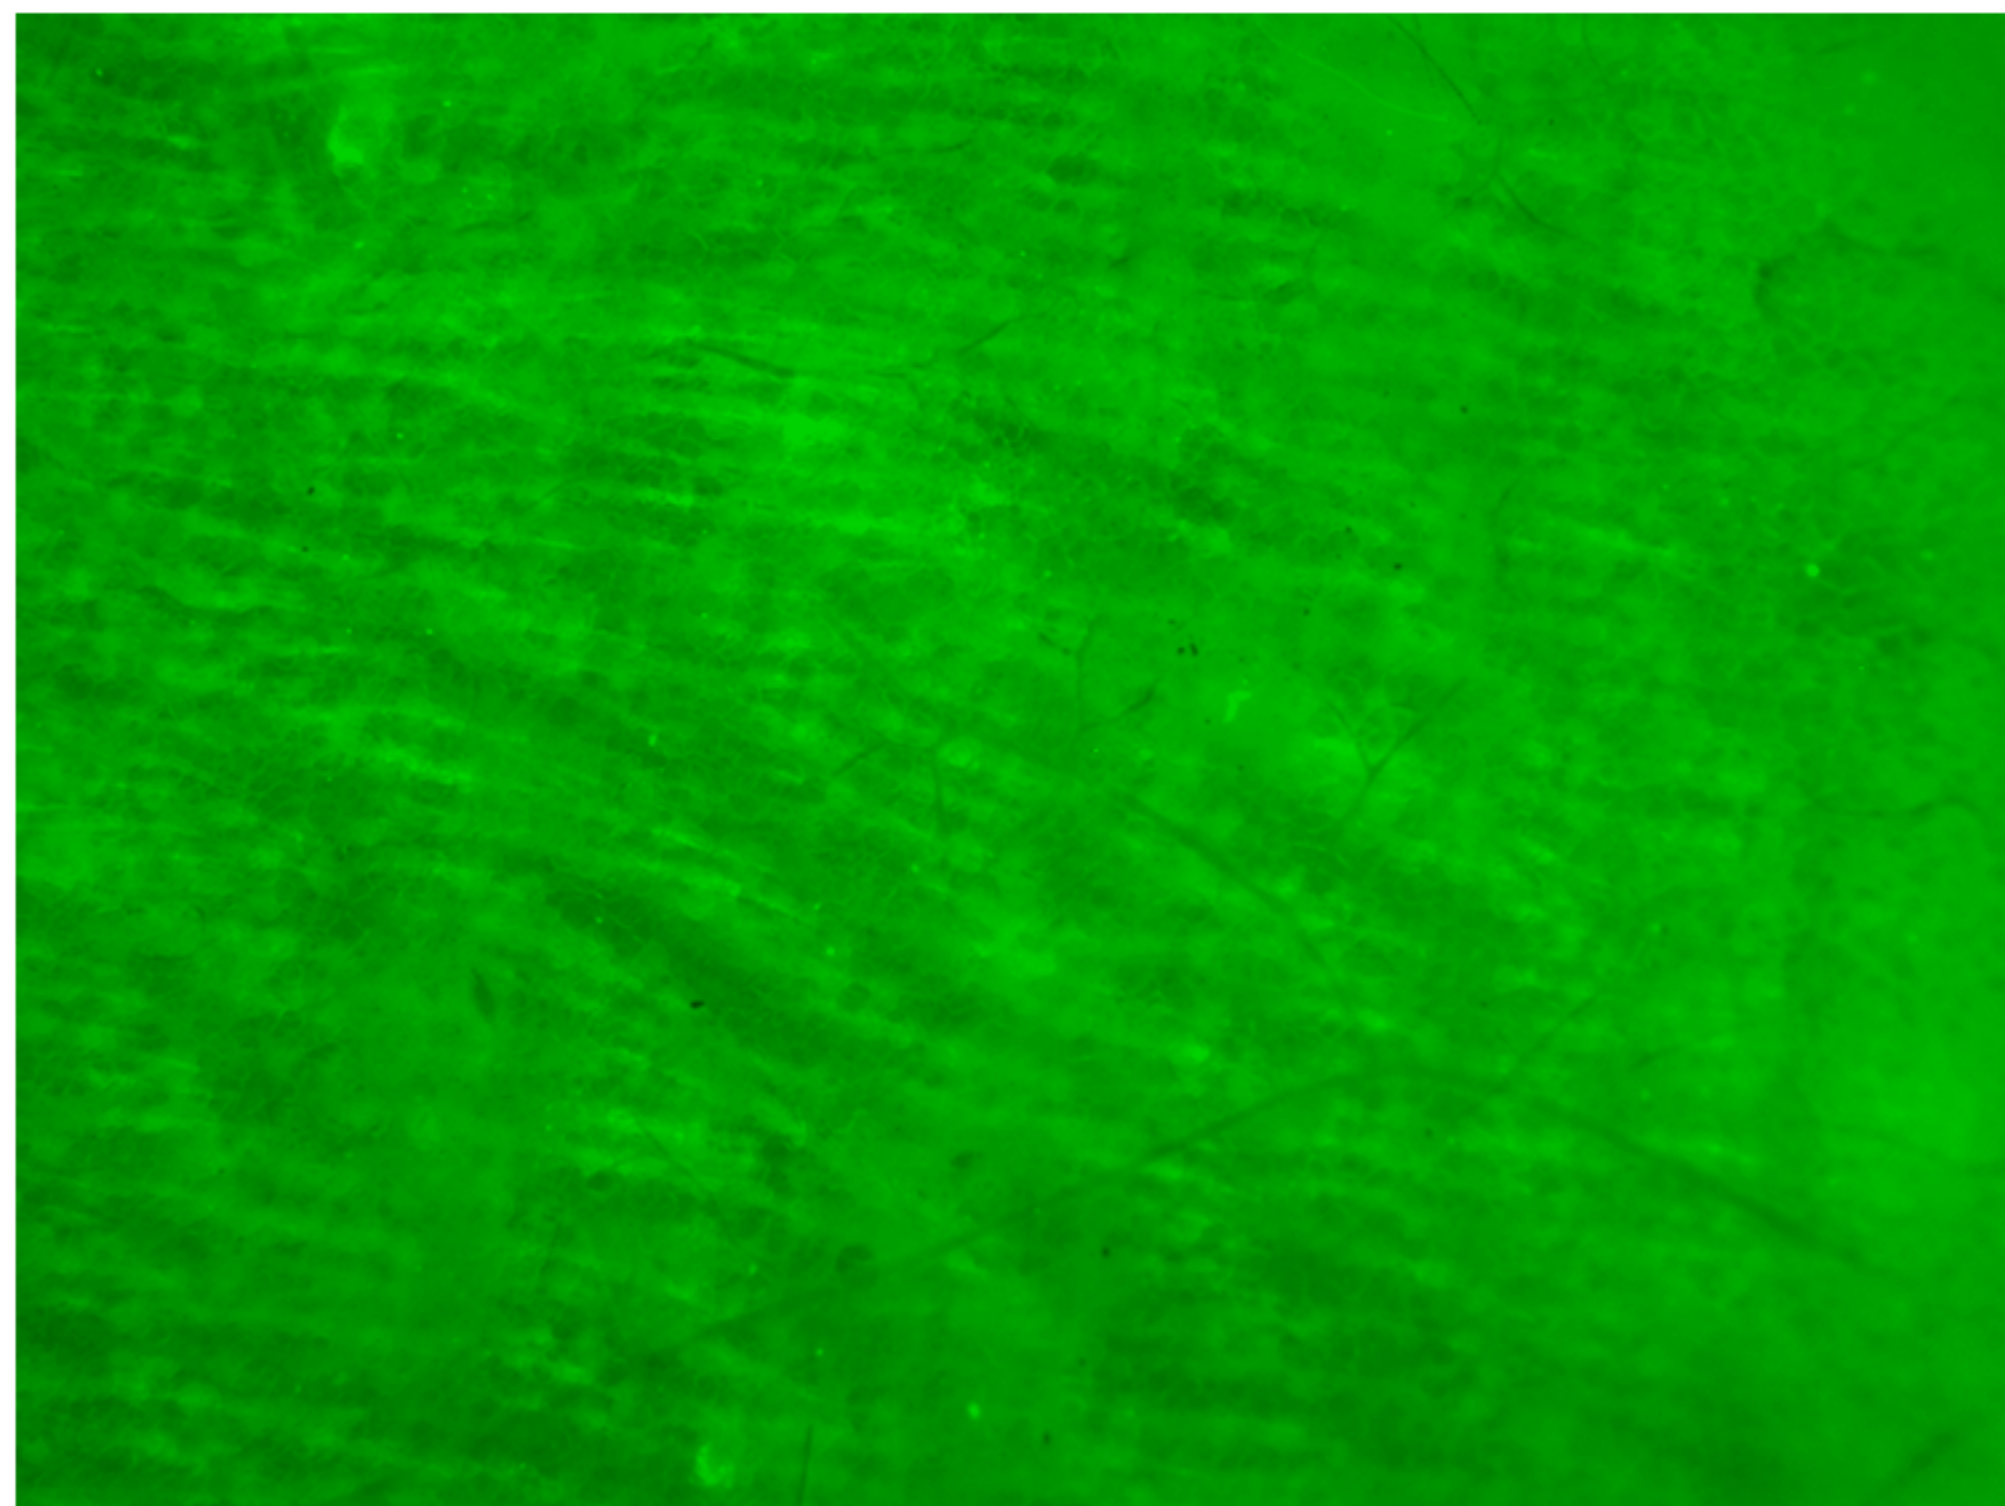

day 0

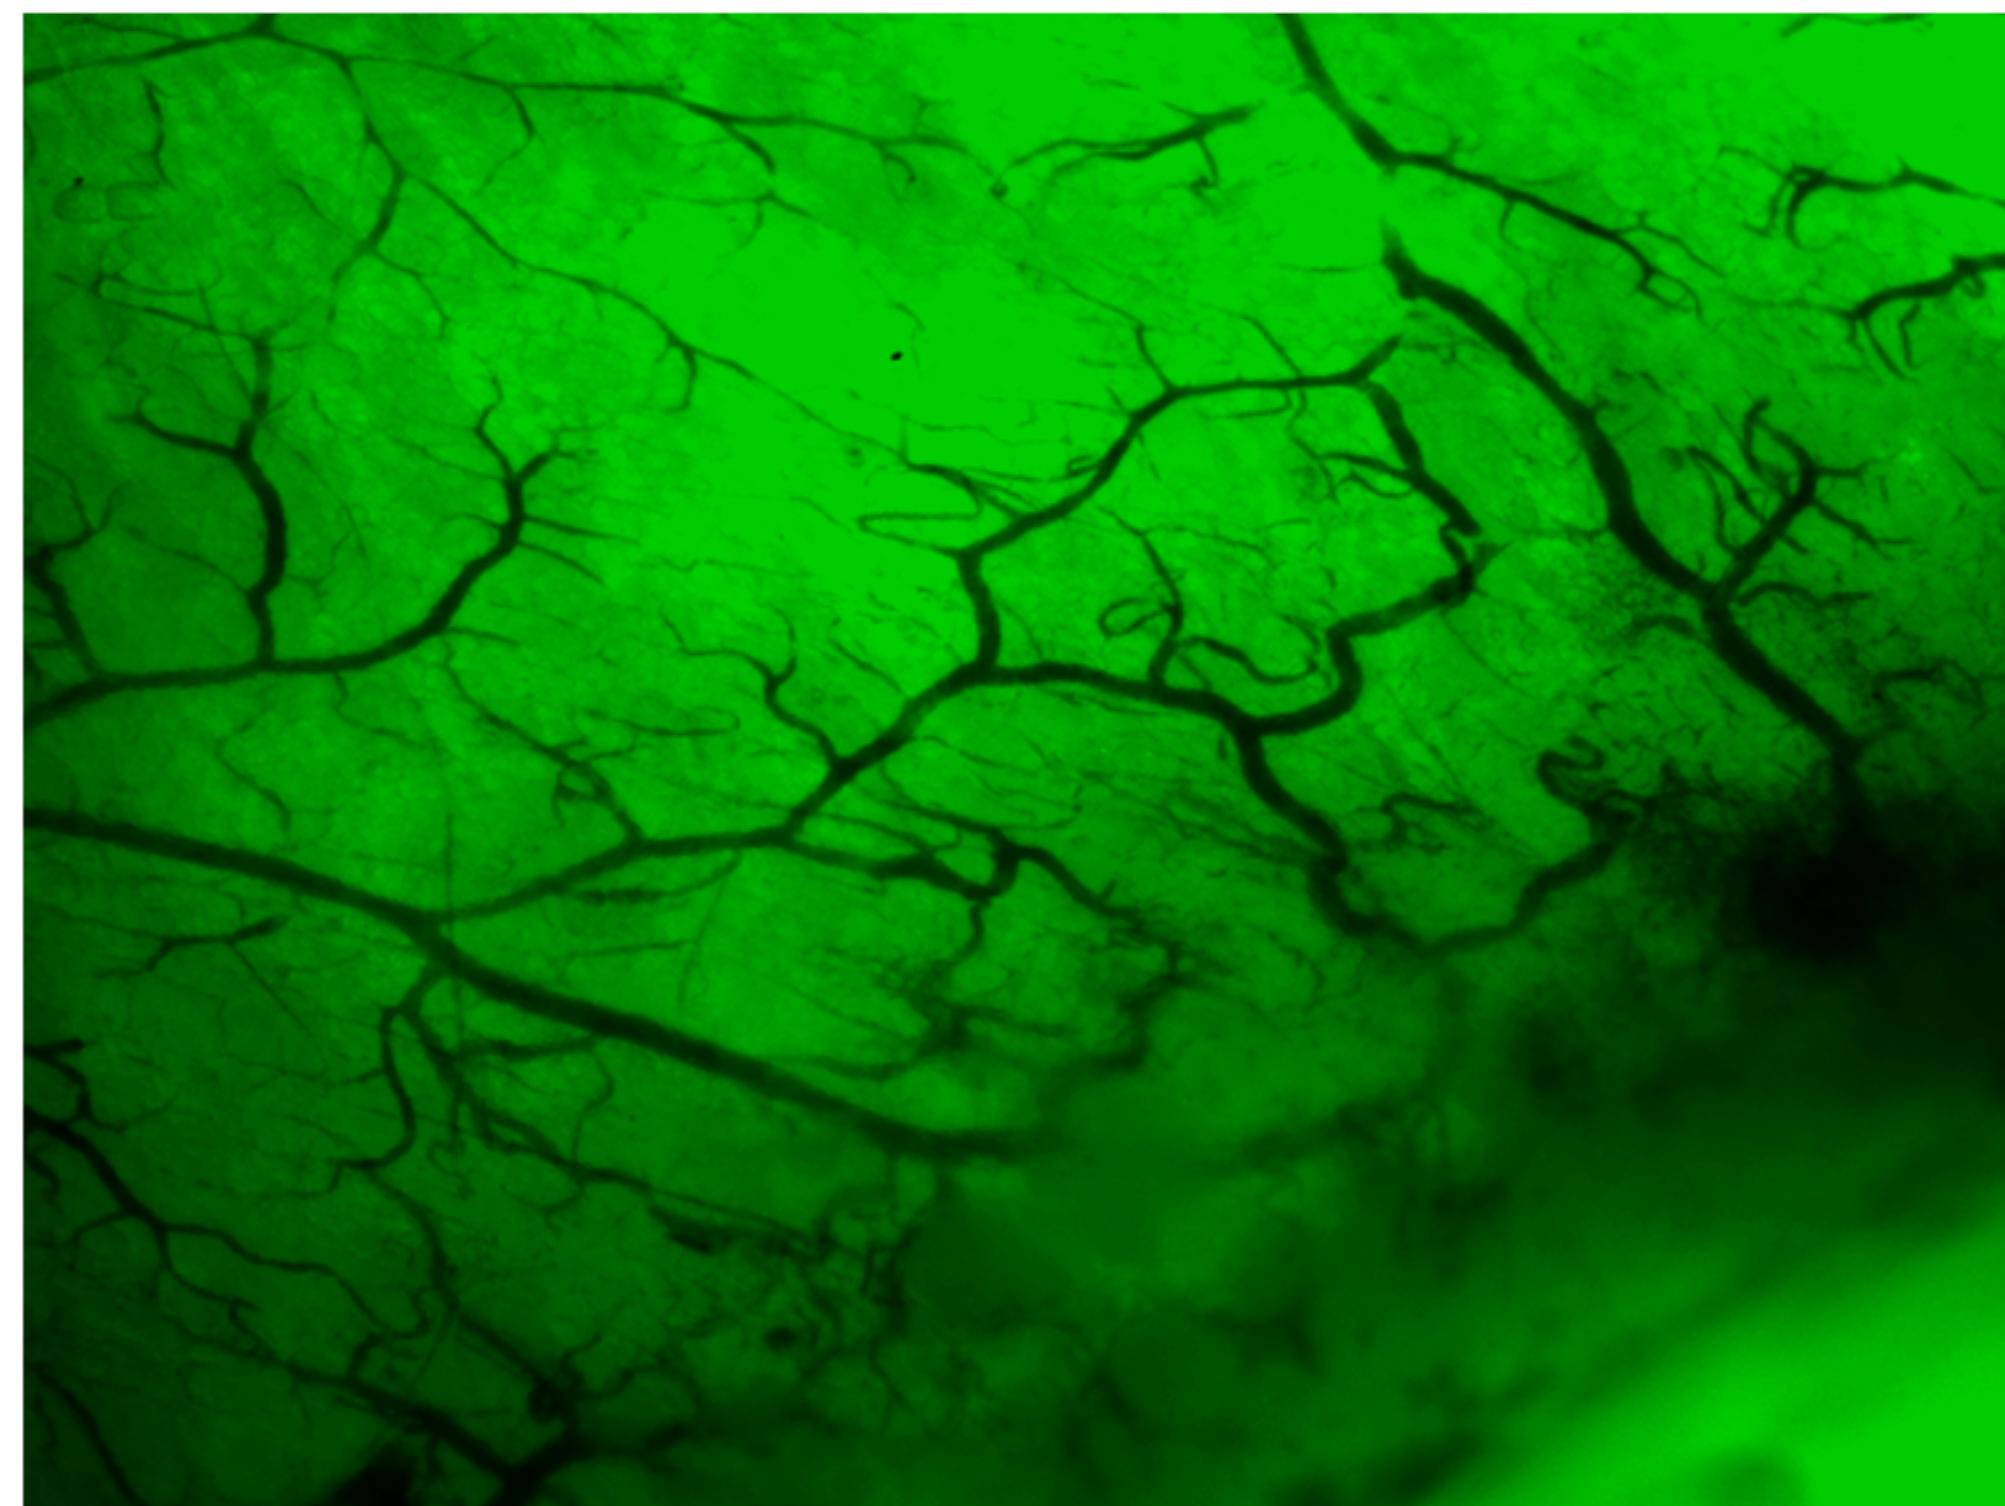

day 7

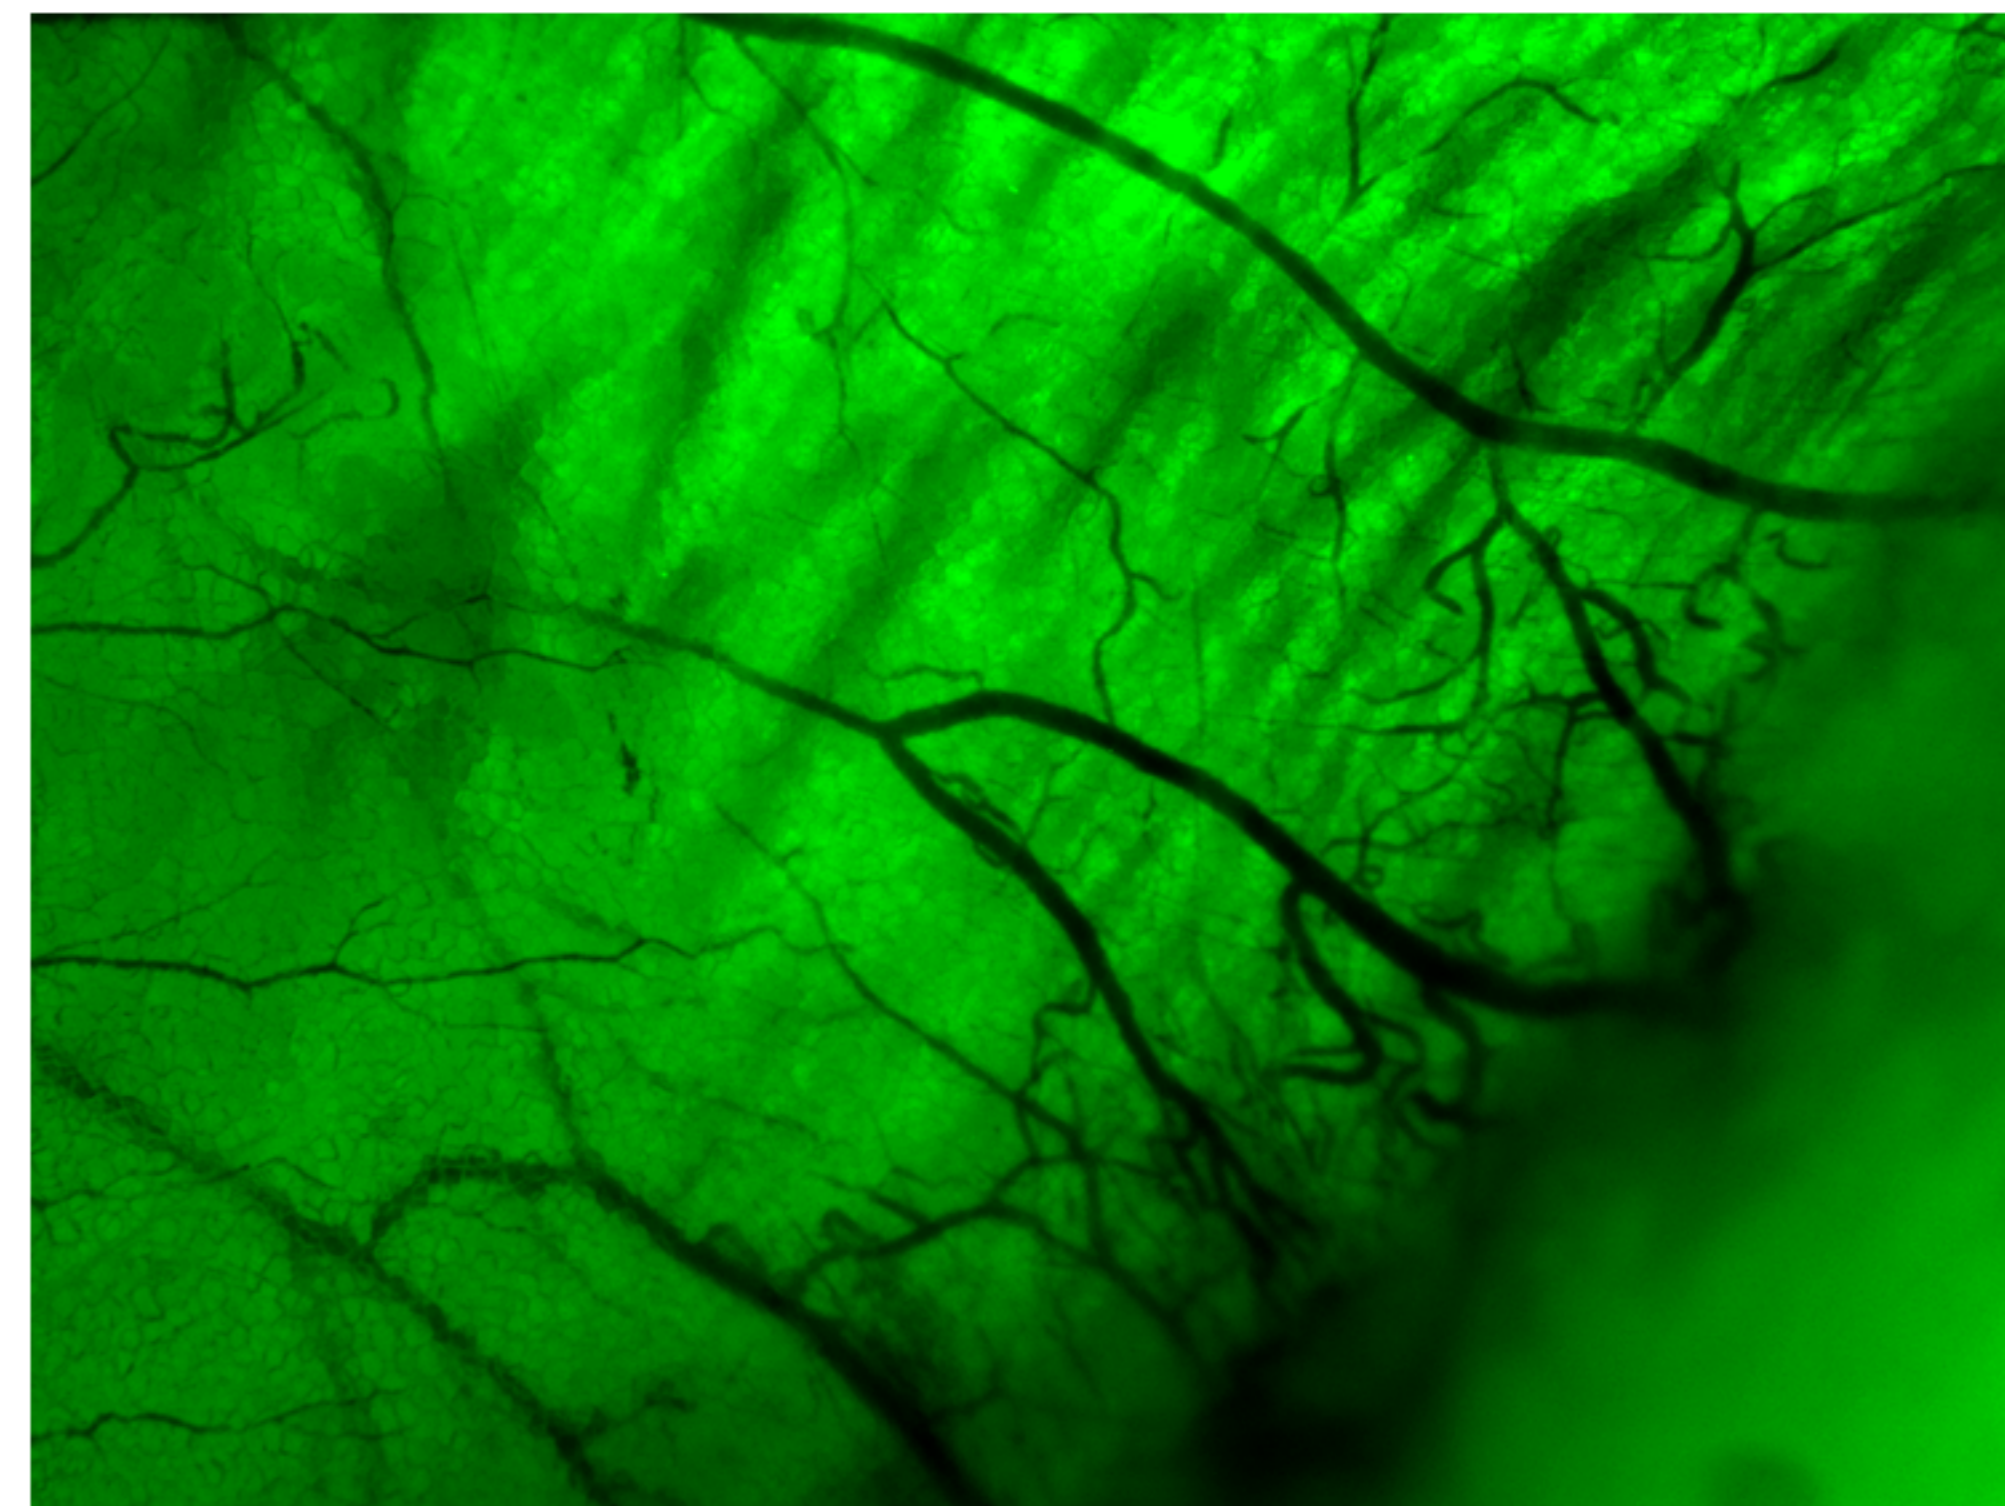

day 14

# Figure Supplement 3

Mouse:

Wild Type

LT $\alpha$ <sup>-/-</sup>

LT $\beta$ <sup>-/-</sup>

Probe:

LT $\alpha$

LT $\beta$

TNF $\alpha$

LT $\alpha$

LT $\beta$

TNF $\alpha$

LT $\alpha$

LT $\beta$

TNF $\alpha$

Tissue:

Skin

PLN

Spleen

Skin

PLN

Spleen

Skin

PLN

Spleen

Skin

Spleen

Skin

Spleen

Skin

Spleen

Skin

MLN

Skin

MLN

Skin

MLN

1 Kb Plus

700 bp -

640 bp -

485 bp -

- 850 bp

- 650 bp

- 500 bp

- 400 bp

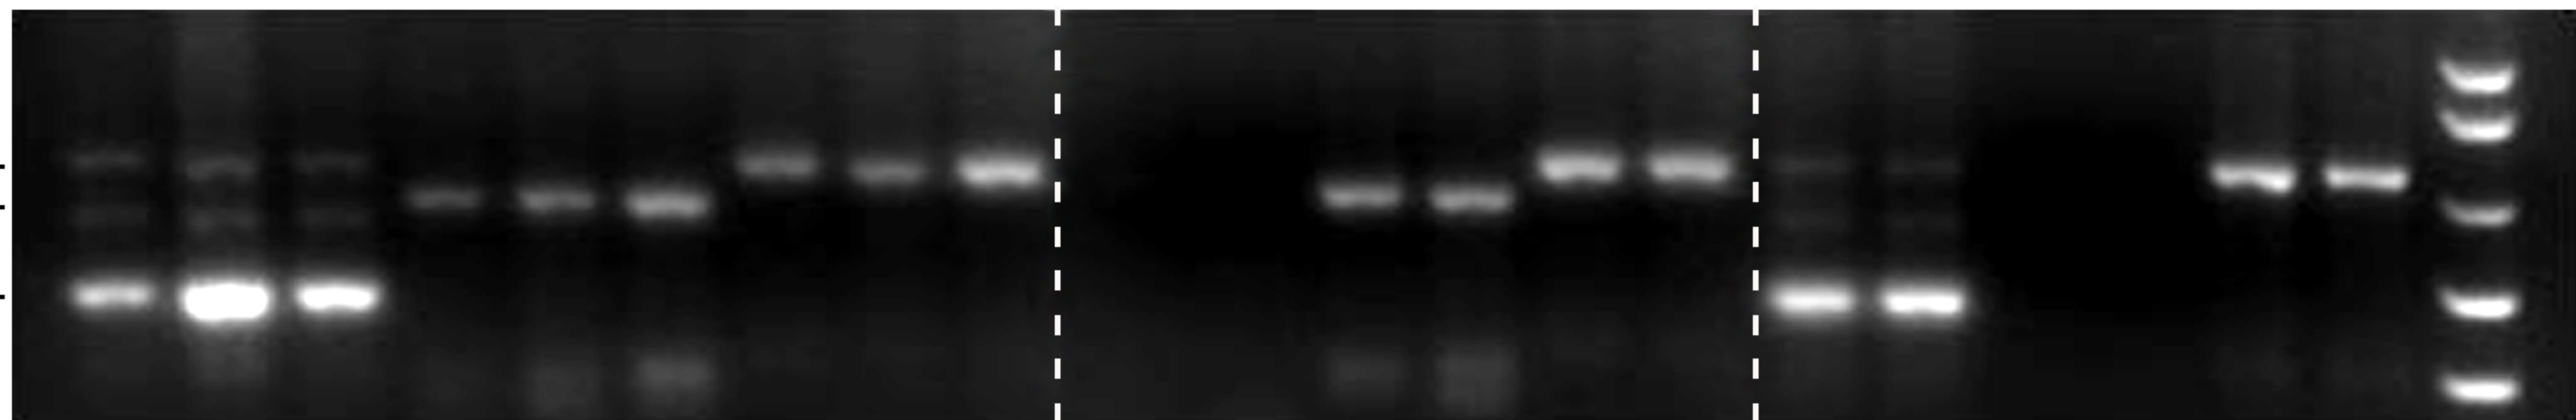

Supplement: blood-2009-12-256065_1.pdf [file blood-2009-12-256065_1.pdf]
